# Supplementary material for: BCL-xL is Correlated With Disease Severity in Neonatal Infants With Sepsis
Source: Research Square preprint supplement (doi:10.21203/rs.3.rs-139524/v1), 2021-01-21
Supplement: Supplementary file 1 [file 1b3b23f23069ac51e18308f3.xlsx]

## Sheet: table 1
Table 1. Each variable point for SNAP-II
Variable	SNAP-II
Mean blood pressure
>29mmHg	0
20-29 mmHg	9
<20 mmHg	19
Lowest temperature
>36.5 ℃	0
35-36.5 ℃	8
>36.5℃	15
PO2/FiO2 ratio
>2.49	0
1.0-2.49	5
0.33-0.99	16
<0.33	28
Lowest blood pH
>7.19	0
7.10-7.19	7
<7.10	16
Multiple seizures
No	0
Yes	19
Urine output
>0.9 ml/kg/h	0
0.1-0.9 ml/kg/h	5
<0.1 ml/kg/h	18
Birth weight
>999 g	-
750-999 g	-
<750 g	-
Small for gestational age
>3rd percentile	-
<3rd percentile	-
APGAR score at 5min
>=7	-
< 7	-
Maximum score	115
SNAP-II = the Score for Neonatal Acute Physiology-II
