# Supplementary material for: BCL-xL is Correlated With Disease Severity in Neonatal Infants With Sepsis
Source: Research Square preprint supplement (doi:10.21203/rs.3.rs-139524/v1), 2021-01-21
Supplement: Supplementary file 3 [file 88e1bc5d75ac869d18bfd77f.xlsx]

## Sheet: table 2
Table 2 The general characteristics of patients
Variable	N (total = 37)
Birth weight
Median (IQR) - g	3000 (2665, 3345)
Distribution – n(%)
<1500 g	0 (0%)
1500–2500 g	8 (21.6%)
>2500 g	29 (78.4%)
Sex - n(%)
Male	25 (67.6%)
Female	12 (32.4%)
Gestational age
Median (IQR) - wk	39 (37, 40)
Distribution – n(%)
<37 wk	7 (18.9%)
>=37 wk	30 (81.1%)
Mode of delivery - n(%)
Vaginal	15 (40.5%)
Cesarean section	22 (59.5)
Postnatal age (IQR) - h	2 (1, 3)
Sepsis type - n (%)
Culture proven	7 (18.9%)
Screen positive	30 (81.1%)
Respiratory support - n (%)
None	0 (0%)
nCPAP	17 (45.9%)
MV	20 (54.1%
SNAP-II (IQR)	10 (10, 23)
Outcomes - n (%)
Died	3 (8.1%)
Survived	34 (91.9%)
MV = mechanical ventilation; nCPAP = nasal continuous positive airway pressure; SNAP-II = the Score for Neonatal Acute Physiology-II
